# Supplementary material for: HNF6 and Rev-erbα integrate hepatic lipid metabolism by overlapping and distinct transcriptional mechanisms
Source: PubMed Central journal article supplement — Genes Dev. 2016 Jul 15;30(14):1636–44. doi: 10.1101/gad.281972.116 (PMC4973293; doi:10.1101/gad.281972.116), 2016-07-15
Supplement: supp_gad.281972.116_Supplemental_Fig_S1.pdf [file supp_gad.281972.116_Supplemental_Fig_S1.pdf]

# Supplemental Figure S1

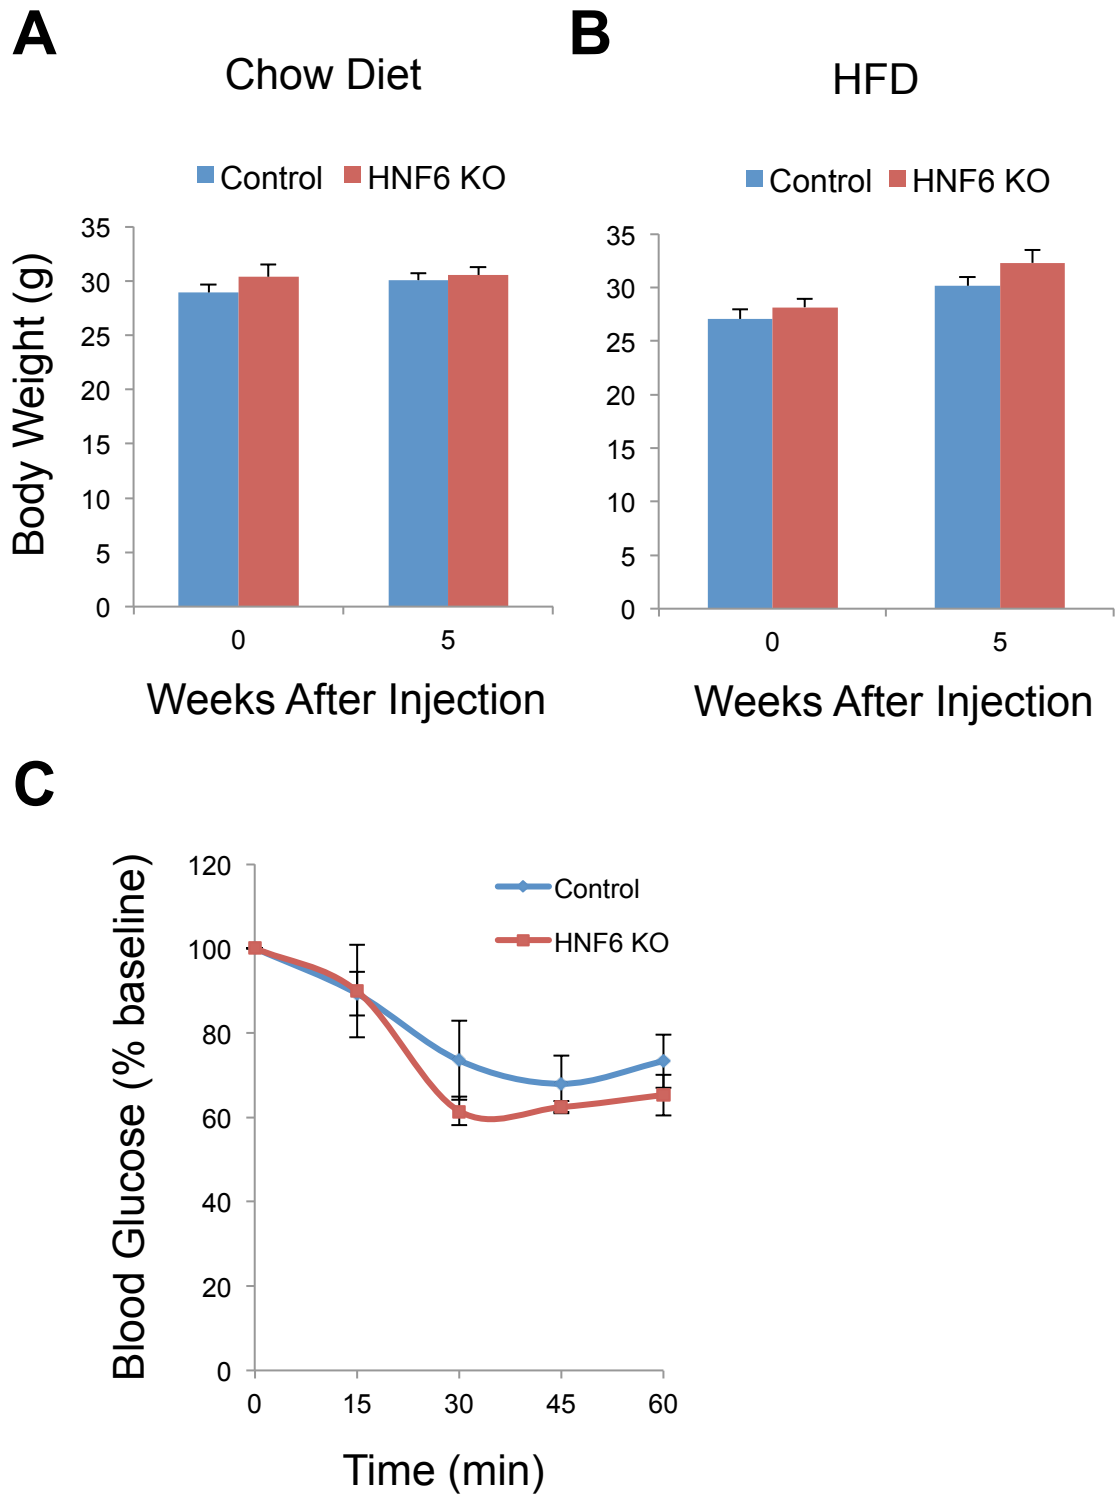

**Supplemental Figure S1. The depletion of hepatic HNF6 in adult mice did not alter body weight and is slightly more insulin sensitive.** (A) Body weight of mice fed normal chow diet. Data are expressed as mean±SEM. n = 6 mice per treatment. (B) Body weight of mice fed high fat diet (HFD). Data are expressed as mean±SEM. n=7 mice per treatment. (C) Results from the insulin tolerance test for mice fed normal chow diet at 4 weeks after injection with the AAV. Data are expressed as mean ±SEM. n=5 mice per treatment.
