# Supplementary material for: HNF6 and Rev-erbα integrate hepatic lipid metabolism by overlapping and distinct transcriptional mechanisms
Source: PubMed Central journal article supplement — Genes Dev. 2016 Jul 15;30(14):1636–44. doi: 10.1101/gad.281972.116 (PMC4973293; doi:10.1101/gad.281972.116), 2016-07-15
Supplement: supp_gad.281972.116_Supplemental_Fig_S2.pdf [file supp_gad.281972.116_Supplemental_Fig_S2.pdf]

# Supplemental Figure S2

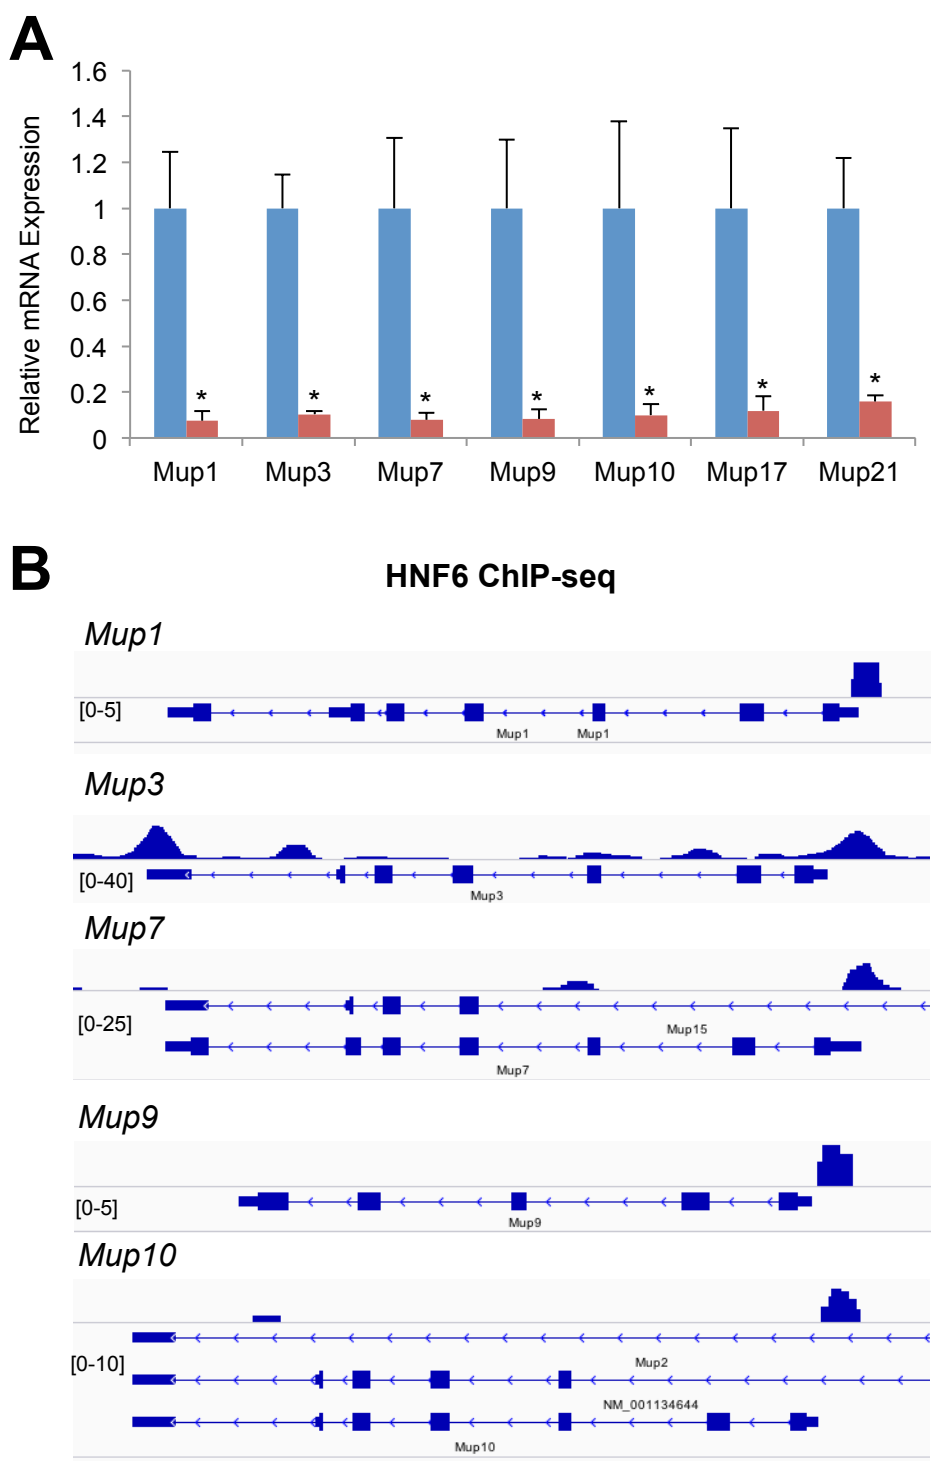

**Supplemental Figure S2. Major urinary protein (Mup) genes were down-regulated in HNF6 KO with HNF6 binding sites nearby.** (A) Relative mRNA level of Mup genes in the wildtype control and HNF6 KO livers. Data are expressed as mean±SEM (\* Student's t-test,  $p < 0.05$ ,  $n=4$  per group). (B) Genome browser view of HNF6 ChIP-seq peaks near Mup genes.
