# Supplementary material for: HNF6 and Rev-erbα integrate hepatic lipid metabolism by overlapping and distinct transcriptional mechanisms
Source: PubMed Central journal article supplement — Genes Dev. 2016 Jul 15;30(14):1636–44. doi: 10.1101/gad.281972.116 (PMC4973293; doi:10.1101/gad.281972.116), 2016-07-15
Supplement: supp_gad.281972.116_Supplemental_Fig_S3.pdf [file supp_gad.281972.116_Supplemental_Fig_S3.pdf]

# Supplemental Figure S3

## A Mouse Liver ZT10

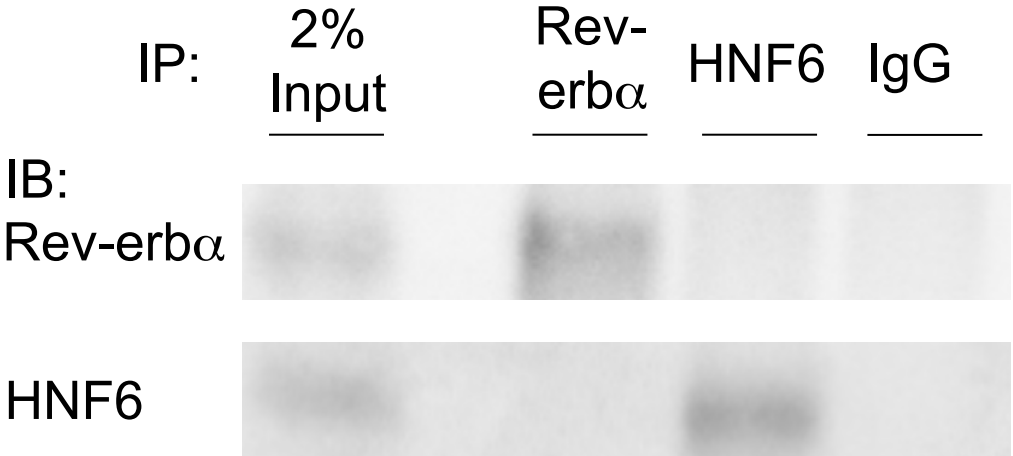

## B Transfected HEK293T Cell

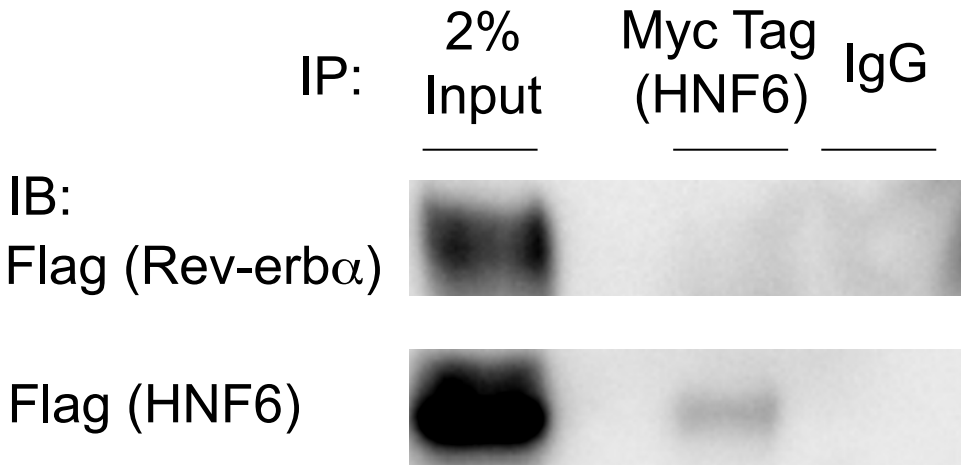

**Supplemental Figure S3. Interaction between Rev-erb $\alpha$  and HNF6 is indirect or not strong enough to be detected by co-immunoprecipitation western blot.** (A) Mouse liver lysates were immunoprecipitated by Rev-erb $\alpha$  antibody, HNF6 antibody or IgG, followed by immunoblot analysis by Rev-erb $\alpha$  antibody and HNF6 antibody. (B) Flag-Rev-erb $\alpha$  and Myc-Flag-HNF6 were coexpressed in HEK293T cells. Cell lysates were immunoprecipitated with Myc antibodies or IgG, followed by immunoblot analysis by Flag antibody.
