# Supplementary material for: HNF6 and Rev-erbα integrate hepatic lipid metabolism by overlapping and distinct transcriptional mechanisms
Source: PubMed Central journal article supplement — Genes Dev. 2016 Jul 15;30(14):1636–44. doi: 10.1101/gad.281972.116 (PMC4973293; doi:10.1101/gad.281972.116), 2016-07-15
Supplement: supp_gad.281972.116_Supplemental_Fig_S4.pdf [file supp_gad.281972.116_Supplemental_Fig_S4.pdf]

# Supplemental Figure S4

## Genes Down-Regulated in HNF6 KO

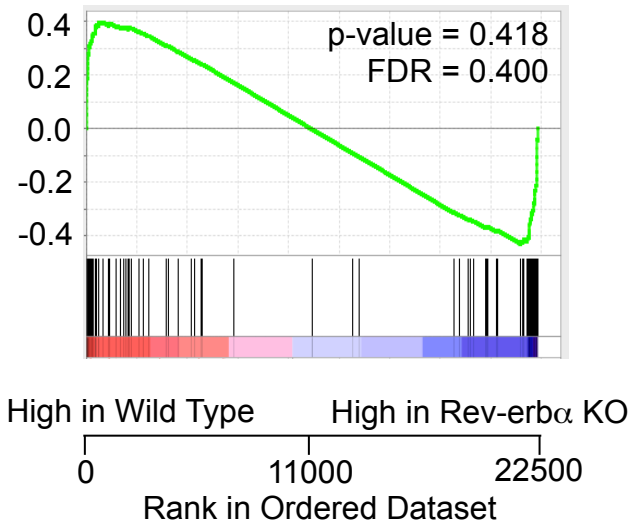

Supplemental Figure S4. GSEA results for the enrichment of genes down-regulated by HNF6 KO in Rev-erb $\alpha$  KO liver.
