# Supplementary material for: HNF6 and Rev-erbα integrate hepatic lipid metabolism by overlapping and distinct transcriptional mechanisms
Source: PubMed Central journal article supplement — Genes Dev. 2016 Jul 15;30(14):1636–44. doi: 10.1101/gad.281972.116 (PMC4973293; doi:10.1101/gad.281972.116), 2016-07-15
Supplement: supp_gad.281972.116_Supplemental_Fig_S5.pdf [file supp_gad.281972.116_Supplemental_Fig_S5.pdf]

# Supplemental Figure S5

## Genes Up-Regulated Exclusively in Rev-erb $\alpha$ KO

| GO: Biological Process                | p-value |
|---------------------------------------|---------|
| Organic Acid Metabolic Process        | 1.1e-6  |
| Monocarboxylic Acid Metabolic Process | 1.3e-6  |
| Lipid Metabolic Process               | 1.9e-6  |
| Fatty Acid Metabolic Process          | 1.0e-4  |
| Rhythmic Process                      | 1.1e-3  |

---

Examples:  
Bmal1, Npas2, Cry1, Clock, E4bp4, Acnat1/2, Acot1/2, Acss3, Adam11, Atf5

---

**Supplemental Figure S5. Gene ontology (GO) analysis of the genes up-regulated exclusively in Rev-erb $\alpha$  KO liver.**
