# Supplementary material for: HNF6 and Rev-erbα integrate hepatic lipid metabolism by overlapping and distinct transcriptional mechanisms
Source: PubMed Central journal article supplement — Genes Dev. 2016 Jul 15;30(14):1636–44. doi: 10.1101/gad.281972.116 (PMC4973293; doi:10.1101/gad.281972.116), 2016-07-15
Supplement: supp_gad.281972.116_Supplemental_Fig_S6.pdf [file supp_gad.281972.116_Supplemental_Fig_S6.pdf]

# Supplemental Figure S6

## Enriched Motif in Unchanged Tethered Rev-erb $\alpha$ Binding Sites

| Motif                                                                             | Motif Name/Class | % Target sites | p-value |
|-----------------------------------------------------------------------------------|------------------|----------------|---------|
|  | CEBP (bZIP)      | 17.52          | 1e-48   |
|  | NFY (CCAAT)      | 22.39          | 1e-35   |
|  | HNF4A (DR1)      | 10.85          | 1e-20   |
|  | PPARE (DR1)      | 15.58          | 1e-16   |
|  | ATF4 (bZIP)      | 5.56           | 1e-15   |

Supplemental Figure S6. Highly enriched motifs in unchanged Rev-erb $\alpha$  tethering binding sites.
